# Supplementary material for: Modulating interface performance between 2D semiconductor MoSi2N4 and its native high-k dielectric Si3N4
Source: Royal Society of Chemistry journal article supplement (doi:10.1039/d4tc01938e), 2024-01-01
Supplement: d4tc01938e1.pdf [file d4tc01938e1.pdf]

**Supplementary Materials**  
**of**  
**Modulating interface performance between 2D semiconductor MoSi<sub>2</sub>N<sub>4</sub> and its native high-*k* dielectric Si<sub>3</sub>N<sub>4</sub>**

Jiahao Chen<sup>1</sup>, Yang Zuo<sup>1</sup>, Chin Yuan Ong<sup>1</sup>, Jingyu He<sup>1</sup>, Yulin Yang<sup>2</sup>, Lai Mun Wong<sup>3</sup>, Xiaoman Zhang<sup>4,\*</sup>,  
and Ming Yang<sup>1,5,6,\*</sup>

<sup>1</sup> Department of Applied Physics, The Hong Kong Polytechnic University, Hung Hom, Hong Kong SAR, China

<sup>2</sup> Fujian Provincial Key Laboratory of Optoelectronic Technology and Devices, School of Optoelectronic and Communication Engineering, Xiamen University of Technology, Xiamen, 361024, China

<sup>3</sup> Institute of Materials Research and Engineering (IMRE), Agency for Science, Technology and Research (A\*STAR), 2 Fusionopolis Way, Innovis #08-03, 138634, Republic of Singapore

<sup>4</sup> College of Photonic and Electronic Engineering, Fujian Normal University, Fuzhou, 35007, China

<sup>5</sup> Research Centre on Data Sciences & Artificial Intelligence, The Hong Kong Polytechnic University, Hung Hom, Hong Kong SAR, China

<sup>6</sup> Research Centre for Nanoscience and Nanotechnology, The Hong Kong Polytechnic University, Hung Hom, Hong Kong SAR, China

\* Author to whom correspondence should be addressed: M.Y. ([kevin.m.yang@polyu.edu.hk](mailto:kevin.m.yang@polyu.edu.hk)) or X.M.Z. ([xmzhang@fjnu.edu.cn](mailto:xmzhang@fjnu.edu.cn))

## 1. DOS of bulk $\beta$ - $\text{Si}_3\text{N}_4$ with/without strain

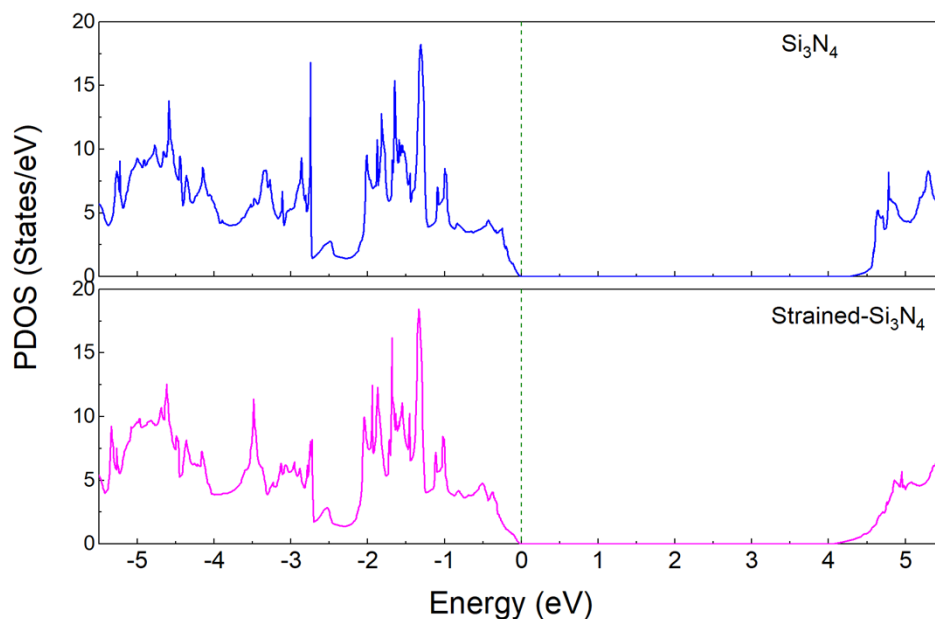

Figure S1. The Total Density of States (TDOS) of  $\text{Si}_3\text{N}_4$  bulk before and after applying the compressive strain.

## 2. PDOS projected on Mo before/after integrating with $\text{Si}_3\text{N}_4$

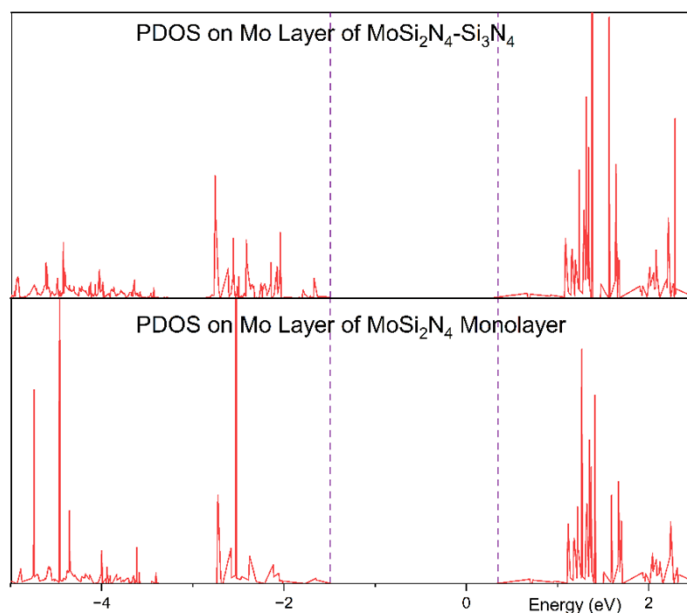

Figure S2. The Projected Density of States (PDOS) on the Mo layer of monolayer  $\text{MoSi}_2\text{N}_4$  and  $\text{MoSi}_2\text{N}_4/\text{Si}_3\text{N}_4$ .

### 3. Planar averaged potential

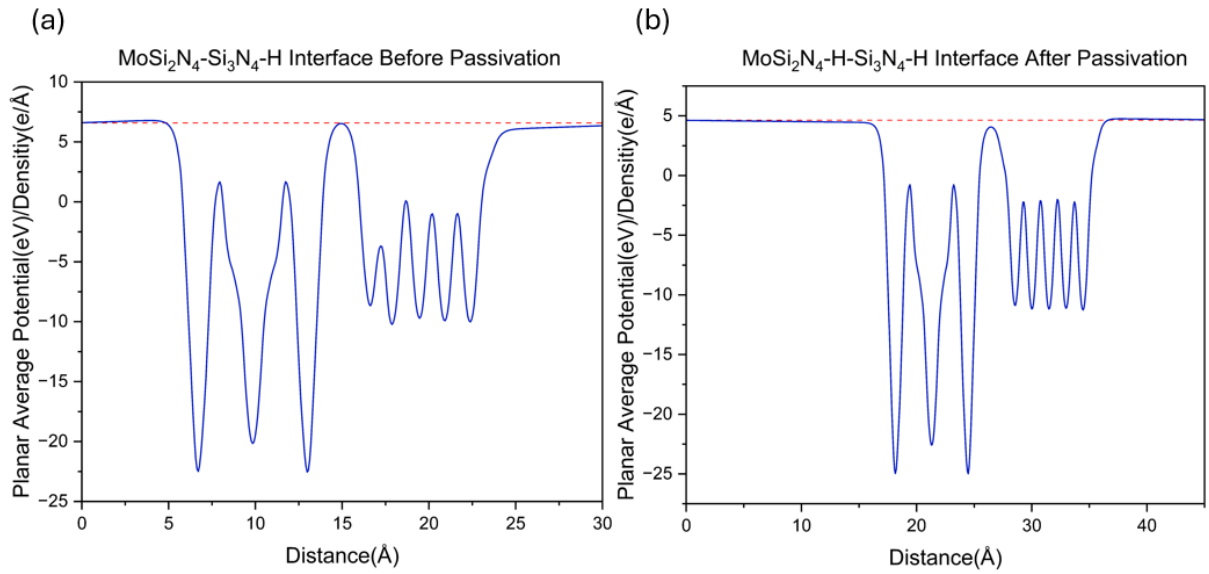

Figure S3. The planar averaged potential of MoSi<sub>2</sub>N<sub>4</sub>/Si<sub>3</sub>N<sub>4</sub> interface (a) before and (b) after hydrogen passivation.

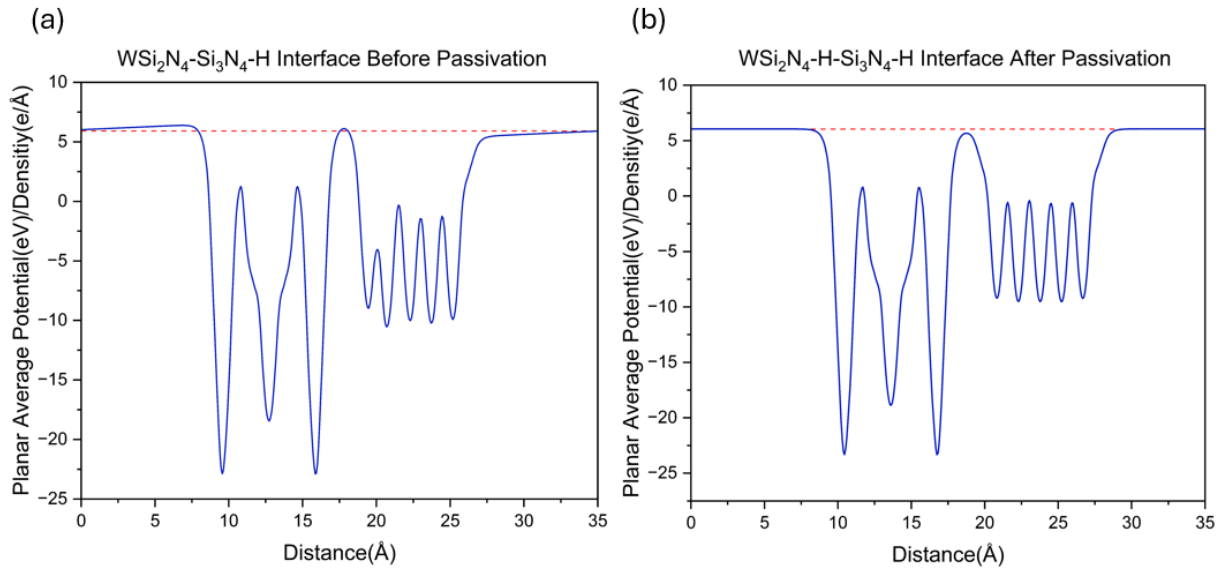

Figure S4. The planar average potential of WSi<sub>2</sub>N<sub>4</sub>- Si<sub>3</sub>N<sub>4</sub> interface (a) before and (b) after hydrogen passivation.

### 4. Charge density redistribution on W plane of 2D WSi<sub>2</sub>N<sub>4</sub>

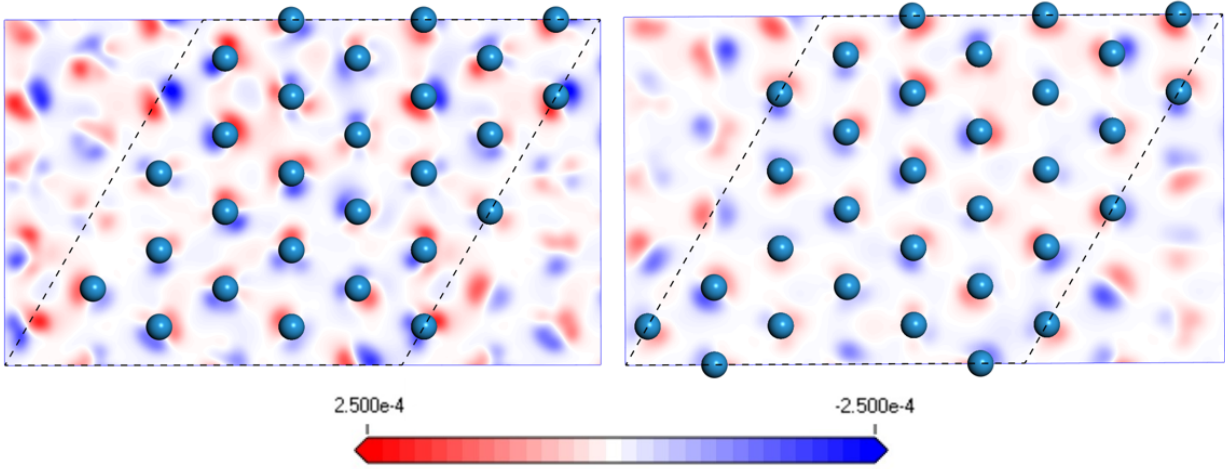

Figure S5 The charge depletion and accumulation around W atoms. The green and purple colours in (b) denote the depleted and accumulated charge density visualised by an iso-surface value of  $1.0 \times 10^{-4} \text{ e}/\text{\AA}^3$ , respectively.
